# Supplementary material for: APC Mutations Are Not Confined to Hotspot Regions in Early-Onset Colorectal Cancer
Source: PubMed Central journal article supplement (PMC7766084; doi:10.3390/cancers12123829), 2020-12-18
Supplement: cancers-12-03829-s001.pdf [file cancers-12-03829-s001.pdf]

# Supplementary Materials: APC Mutations Are Not Confined to Hotspot Regions in Early-Onset Colorectal Cancer

Alan Aitchison, Christopher Hakkaart, Robert C. Day, Helen R. Morrin, Frank A. Frizelle and Jacqueline I. Keenan

**Table S1. APC amplicon specific primers for next generation sequencing**

| Name               | Sequence (5'-3')                            | Product Size (bp) |
|--------------------|---------------------------------------------|-------------------|
| APC Exon 5 F APC   | ACGACGCTCTTCCGATCTCACCATGACTGACGTATTTGCT    | 389               |
| Exon 5 R APC Exon  | CGTGTGCTCTTCCGATCTAGAGCCAAAATAAACACAGCCTT   |                   |
| 6 F APC Exon 6 R   | ACGACGCTCTTCCGATCTCCTGAGCTTTTAAAGTGGTAGCC   | 458               |
| APC Exon 8 F APC   | CGTGTGCTCTTCCGATCTTGTAAGTACAGCTAAAGTAAGGT   |                   |
| Exon 8 R APC Exon  | ACGACGCTCTTCCGATCTTCTGCAGTTAATGCTCATATGCAA  | 402               |
| 9 F1 APC Exon 9 R1 | CGTGTGCTCTTCCGATCTTGGCATTAGTGACCAGGGTTT     | 397               |
| APC Exon 9 F2 APC  | ACGACGCTCTTCCGATCTTCATCACTTAATTGGTTTTTGGCTT |                   |
| Exon 9 R2 APC Exon | CGTGTGCTCTTCCGATCTAAGGACTCGGATTTACAGCC      | 374               |
| 11 F1 APC Exon 11  | ACGACGCTCTTCCGATCTGGAAATCCCGGGGAGTAA        |                   |
| R1 APC Exon 11 F2  | CGTGTGCTCTTCCGATCTTGAGTAGCACAAATGGCTGA      | 406               |
| APC Exon 11 R2     | ACGACGCTCTTCCGATCTGGGGTGGAGAACTGGCATA       |                   |
| APC Exon 12 F APC  | CGTGTGCTCTTCCGATCTACCTTGTGGCTACATCTCCAAA    | 320               |
| Exon 12 R APC Exon | ACGACGCTCTTCCGATCTTAGGGGGACTACAGGCCATT      |                   |
| 13 F APC Exon 13 R | CGTGTGCTCTTCCGATCTGCGAATGTGAAGCACAGGTT      | 511               |
| APC Exon 15 F1     | ACGACGCTCTTCCGATCTTGGCTTCAAGTTGTCTTTTTAATG  | 476               |
| APC Exon 15 R1     | CGTGTGCTCTTCCGATCTTGAGATACTAAATACTGAGCAACAA |                   |
| APC Exon 15 F2     | ACGACGCTCTTCCGATCTAGTGATAGGATTACAGGCGTG     | 387               |
| APC Exon 15 R2     | CGTGTGCTCTTCCGATCTGAAATTAGGGAATCTCATGG      |                   |
| APC Exon 15 F3     | ACGACGCTCTTCCGATCTTCCCAAGGCATCTCATCGT       | 387               |
| APC Exon 15 R3     | CGTGTGCTCTTCCGATCTATGGCTGACACTTCTTCCATGA    | 436               |
| APC Exon 15 F4     | ACGACGCTCTTCCGATCTAGAAGCTCTGCTGCCCATAC      |                   |
| APC Exon 15 R4     | CGTGTGCTCTTCCGATCTCCTTCCAGAGTTCAACTGCTCA    | 449               |
| APC Exon 15 F5     | ACGACGCTCTTCCGATCTTCCATACAGGTCACGGGGAG      |                   |
| APC Exon 15 R5     | CGTGTGCTCTTCCGATCTTGGATGGAGCTGATTCTGCC      | 470               |
| APC Exon 15 F6     | ACGACGCTCTTCCGATCTAGCAGTGAGAATACGTCCACA     |                   |
| APC Exon 15 R6     | CGTGTGCTCTTCCGATCTGCTTTGTGCTGGCTGATT        | 504               |
|                    | ACGACGCTCTTCCGATCTGCAGACTGCAGGGTTCTAGT      |                   |
|                    | CGTGTGCTCTTCCGATCTGACCCTCTGAACTGCAGCAT      |                   |
|                    | ACGACGCTCTTCCGATCTAACAGCTCAAACCAAGCGAG      |                   |
|                    | CGTGTGCTCTTCCGATCTTTTGAAGCAGTCTGGGCTGG      |                   |

Amplicon-specific primers (black bases) designed with non-specific 18bp sequences at the 5' end of primers (red bases). Two non-specific sequences used, one for forward primers, one for reverse primers. bp, base pairs.

**Table S2. Forward adapter primers for creating next generation sequencing libraries**

| <b>Name</b> | <b>Sequence (5'-3')</b>                                                                           |
|-------------|---------------------------------------------------------------------------------------------------|
| FPI1        | AAT GAT ACG GCG ACC ACC GAG ATC TAC AC <b>CGTGAT</b> ACAC T CTT TCC CTA CAC GAC GCT CTT CCG ATC T |
| FPI2        | AAT GAT ACG GCG ACC ACC GAG ATC TAC AC <b>ACATCG</b> ACAC T CTT TCC CTA CAC GAC GCT CTT CCG ATC T |
| FPI3        | AAT GAT ACG GCG ACC ACC GAG ATC TAC AC <b>GCCTAA</b> ACAC T CTT TCC CTA CAC GAC GCT CTT CCG ATC T |
| FPI4        | AAT GAT ACG GCG ACC ACC GAG ATC TAC AC <b>TGGTCA</b> ACAC T CTT TCC CTA CAC GAC GCT CTT CCG ATC T |
| FPI5        | AAT GAT ACG GCG ACC ACC GAG ATC TAC AC <b>CACTGT</b> ACAC T CTT TCC CTA CAC GAC GCT CTT CCG ATC T |
| FPI6        | AAT GAT ACG GCG ACC ACC GAG ATC TAC AC <b>ATTGGC</b> ACAC T CTT TCC CTA CAC GAC GCT CTT CCG ATC T |
| FPI7        | AAT GAT ACG GCG ACC ACC GAG ATC TAC AC <b>GATCTG</b> ACAC T CTT TCC CTA CAC GAC GCT CTT CCG ATC T |
| FPI8        | AAT GAT ACG GCG ACC ACC GAG ATC TAC AC <b>TCAAGT</b> ACAC T CTT TCC CTA CAC GAC GCT CTT CCG ATC T |
| FPI9        | AAT GAT ACG GCG ACC ACC GAG ATC TAC AC <b>CTGATC</b> ACAC T CTT TCC CTA CAC GAC GCT CTT CCG ATC T |
| FPI10       | AAT GAT ACG GCG ACC ACC GAG ATC TAC AC <b>AAGCTA</b> ACAC T CTT TCC CTA CAC GAC GCT CTT CCG ATC T |
| FPI11       | AAT GAT ACG GCG ACC ACC GAG ATC TAC AC <b>GTAGCC</b> ACAC T CTT TCC CTA CAC GAC GCT CTT CCG ATC T |
| FPI12       | AAT GAT ACG GCG ACC ACC GAG ATC TAC AC <b>TACAAG</b> ACAC T CTT TCC CTA CAC GAC GCT CTT CCG ATC T |
| FPI13       | AAT GAT ACG GCG ACC ACC GAG ATC TAC AC <b>TTGACT</b> ACAC T CTT TCC CTA CAC GAC GCT CTT CCG ATC T |
| FPI14       | AAT GAT ACG GCG ACC ACC GAG ATC TAC AC <b>GGAACT</b> ACAC T CTT TCC CTA CAC GAC GCT CTT CCG ATC T |
| FPI15       | AAT GAT ACG GCG ACC ACC GAG ATC TAC AC <b>TGACAT</b> ACAC T CTT TCC CTA CAC GAC GCT CTT CCG ATC T |
| FPI16       | AAT GAT ACG GCG ACC ACC GAG ATC TAC AC <b>GGACGG</b> ACAC T CTT TCC CTA CAC GAC GCT CTT CCG ATC T |

Forward adapter primers with unique index sequences shown in **red**.

Table S3. Reverse adapter primers for creating next generation sequencing libraries

| Name  | Sequence (5'-3')                                                                          |
|-------|-------------------------------------------------------------------------------------------|
| RPI1  | CAA GCA GAA GAC GGC ATA CGA GAT <b>CGTGAT</b> GTG ACT GGA GTT CAG ACG TGT GCT CTT CCG ATC |
| RPI2  | CAA GCA GAA GAC GGC ATA CGA GAT <b>ACATCG</b> GTG ACT GGA GTT CAG ACG TGT GCT CTT CCG ATC |
| RPI3  | CAA GCA GAA GAC GGC ATA CGA GAT <b>GCCTAA</b> GTG ACT GGA GTT CAG ACG TGT GCT CTT CCG ATC |
| RPI4  | CAA GCA GAA GAC GGC ATA CGA GAT <b>TGGTCA</b> GTG ACT GGA GTT CAG ACG TGT GCT CTT CCG ATC |
| RPI5  | CAA GCA GAA GAC GGC ATA CGA GAT <b>CACTGT</b> GTG ACT GGA GTT CAG ACG TGT GCT CTT CCG ATC |
| RPI6  | CAA GCA GAA GAC GGC ATA CGA GAT <b>ATTGGC</b> GTG ACT GGA GTT CAG ACG TGT GCT CTT CCG ATC |
| RPI7  | CAA GCA GAA GAC GGC ATA CGA GAT <b>GATCTG</b> GTG ACT GGA GTT CAG ACG TGT GCT CTT CCG ATC |
| RPI8  | CAA GCA GAA GAC GGC ATA CGA GAT <b>TCAAGT</b> GTG ACT GGA GTT CAG ACG TGT GCT CTT CCG ATC |
| RPI9  | CAA GCA GAA GAC GGC ATA CGA GAT <b>CTGATC</b> GTG ACT GGA GTT CAG ACG TGT GCT CTT CCG ATC |
| RPI10 | CAA GCA GAA GAC GGC ATA CGA GAT <b>AAGCTA</b> GTG ACT GGA GTT CAG ACG TGT GCT CTT CCG ATC |
| RPI11 | CAA GCA GAA GAC GGC ATA CGA GAT <b>GTAGCC</b> GTG ACT GGA GTT CAG ACG TGT GCT CTT CCG ATC |
| RPI12 | CAA GCA GAA GAC GGC ATA CGA GAT <b>TACAAG</b> GTG ACT GGA GTT CAG ACG TGT GCT CTT CCG ATC |
| RPI13 | CAA GCA GAA GAC GGC ATA CGA GAT <b>TTGACT</b> GTG ACT GGA GTT CAG ACG TGT GCT CTT CCG ATC |
| RPI14 | CAA GCA GAA GAC GGC ATA CGA GAT <b>GGAACT</b> GTG ACT GGA GTT CAG ACG TGT GCT CTT CCG ATC |
| RPI15 | CAA GCA GAA GAC GGC ATA CGA GAT <b>TGACAT</b> GTG ACT GGA GTT CAG ACG TGT GCT CTT CCG ATC |
| RPI16 | CAA GCA GAA GAC GGC ATA CGA GAT <b>GGACGG</b> GTG ACT GGA GTT CAG ACG TGT GCT CTT CCG ATC |

Reverse adapter primers with unique index sequences shown in **red**
